# Supplementary material for: Prognostic significance of first-degree atrioventricular block in a large Asian population: a prospective cohort study
Source: HighWire-hosted journal article supplement (doi:10.1136/bmjopen-2022-062005), 2022-04-01
Supplement: bmjopen-2022-062005supp001_data_supplement.pdf [file bmjopen-2022-062005supp001_data_supplement.pdf]

Online table 1. Associations between first-degree AVB and risks of adverse outcomes in sensitively analysis.

| Outcome               | Model 1          | <i>P</i> | Model 2          | <i>P</i> | Model 3           | <i>P</i> | Model 4          | <i>P</i> | Model 5          | <i>P</i> |
|-----------------------|------------------|----------|------------------|----------|-------------------|----------|------------------|----------|------------------|----------|
|                       | (95% CI)         | value    | HR (95% CI)      | value    | HR (95% CI)       | value    | HR (95% CI)      | value    | HR (95% CI)      | value    |
| All events            | 1.88 (1.16–3.05) | 0.011    | 1.67 (1.01–2.76) | 0.045    | 2.77 (0.96–8.02)  | 0.060    | 1.83 (0.86-3.89) | 0.117    | 1.00 (0.93-1.08) | 0.985    |
| Mortality             |                  |          |                  |          |                   |          |                  |          |                  |          |
| All-cause mortality   | 1.23 (0.54–2.76) | 0.624    | 1.00 (0.41–2.44) | 0.993    | 2.65 (0.66–10.63) | 0.170    | 1.82 (0.67-4.97) | 0.241    | 1.01 (0.91-1.13) | 0.798    |
| CVD-related mortality | 1.58 (0.58–4.33) | 0.372    | 1.28 (0.41–4.07) | 0.672    | 1.34 (0.11–16.82) | 0.821    | 0.74 (0.10-5.27) | 0.738    | 0.98 (0.85-1.14) | 0.806    |
| CVD                   |                  |          |                  |          |                   |          |                  |          |                  |          |
| Total                 | 2.21 (1.32–3.72) | 0.003    | 1.99 (1.16–3.40) | 0.013    | 1.95 (0.46–8.33)  | 0.365    | 1.38 (0.51-3.73) | 0.529    | 0.98 (0.90-1.07) | 0.715    |
| CHD                   | 1.26 (0.40–4.01) | 0.696    | 0.96 (0.24–3.92) | 0.957    | 1.69 (0.20–14.37) | 0.630    | 0.63 (0.08-4.72) | 0.649    | 0.87 (0.75-1.01) | 0.065    |
| Stroke                | 2.47 (1.38–4.44) | 0.002    | 2.31 (1.29–4.16) | 0.005    | 2.01 (0.27–15.05) | 0.497    | 1.66 (0.52-5.33) | 0.395    | 1.01 (0.91-1.13) | 0.829    |

Model 1: Included participants without taking beta-blockers and calcium-channel blockers.

Model 2: Included participants without CVD at baseline.

Model 3: Included participants with CVD at baseline.

Model 4: The regression analyses that interaction between first-degree AVB and sex.

Model 5: The regression analyses in which PR interval served as a continuous variable (per SD increase).

Adjusted for age, sex, body mass index, heart rate, current smoking, current drinking, TC, HDL-C, triglyceride, eGFR, SBP, beta-blocker treatment, calcium blocker treatment, diabetes, and history of CVD and left ventricular systolic and diastolic function (LVEF and E/A ratio) in each model.

Abbreviations: CVD = cardiovascular disease; CHD = coronary heart disease, LVEF = left ventricular ejection fraction; E/A ratio = the mitral early to late diastolic flow velocity ratio.
